# Supplementary material for: High rates of SARS-CoV-2 infection in pregnant Ugandan women and association with stunting in infancy
Source: bioRxiv or medRxiv preprint supplement (doi:10.1101/2023.06.16.23291450), 2023-06-20
Supplement: Supplementary file [file media-1.pdf]

**Table S1. Linear mixed effects regression models to identify the effects of SARS-CoV-2 in pregnancy and other maternal and infant factors on length- and weight-for-age Z scores through 24 weeks of life with interaction terms**

| <i>Predictors</i>                                          | <b>Length-for-age Z score</b> |                   |               |                  | <b>Weight-for-age Z score</b> |                   |               |                  |
|------------------------------------------------------------|-------------------------------|-------------------|---------------|------------------|-------------------------------|-------------------|---------------|------------------|
|                                                            | <i>Estimates</i>              | <i>std. Error</i> | <i>CI</i>     | <i>p</i>         | <i>Estimates</i>              | <i>std. Error</i> | <i>CI</i>     | <i>p</i>         |
| <b>SARS-CoV-2 in pregnancy (Ref=Uninfected)</b>            |                               |                   |               |                  |                               |                   |               |                  |
| <b>Early infection</b>                                     | -1.75                         | 0.46              | -2.66 – -0.85 | <b>&lt;0.001</b> | -0.18                         | 0.41              | -0.98 – 0.62  | 0.661            |
| <b>Late infection</b>                                      | 0.56                          | 0.50              | -0.42 – 1.55  | 0.263            | 1.02                          | 0.43              | 0.17 – 1.87   | <b>0.019</b>     |
| <b>Infant age (weeks)</b>                                  | 0.00                          | 0.01              | -0.02 – 0.02  | 0.761            | -0.00                         | 0.00              | -0.01 – 0.01  | 0.861            |
| <b>Placental malaria</b>                                   | -0.41                         | 0.43              | -1.27 – 0.44  | 0.344            | -0.32                         | 0.41              | -1.12 – 0.49  | 0.440            |
| <b>Gravidity</b>                                           | -0.22                         | 0.10              | -0.42 – -0.02 | <b>0.035</b>     | -0.14                         | 0.10              | -0.33 – 0.05  | 0.148            |
| <b>Mother achieved <math>\geq</math> O level education</b> | 0.41                          | 0.28              | -0.13 – 0.96  | 0.135            | 0.26                          | 0.26              | -0.25 – 0.77  | 0.312            |
| <b>BMI of mother at enrollment</b>                         | 0.07                          | 0.03              | 0.01 – 0.13   | <b>0.033</b>     | 0.13                          | 0.03              | 0.07 – 0.19   | <b>&lt;0.001</b> |
| <b>Infant sex (female)</b>                                 | 0.39                          | 0.27              | -0.14 – 0.92  | 0.145            | 0.08                          | 0.25              | -0.42 – 0.57  | 0.759            |
| <b>Infant birth length (cm)</b>                            | 0.13                          | 0.05              | 0.02 – 0.23   | <b>0.019</b>     | 0.11                          | 0.05              | 0.01 – 0.21   | <b>0.026</b>     |
| <b>Interaction terms:</b>                                  |                               |                   |               |                  |                               |                   |               |                  |
| <b>Early infection x Infant age</b>                        | 0.03                          | 0.01              | 0.00 – 0.05   | <b>0.029</b>     | -0.01                         | 0.01              | -0.02 – 0.00  | 0.067            |
| <b>Late infection x Infant age</b>                         | -0.02                         | 0.02              | -0.05 – 0.01  | 0.229            | -0.02                         | 0.01              | -0.03 – -0.01 | <b>0.007</b>     |
| <b>Early infection x Placental malaria</b>                 | 0.72                          | 0.59              | -0.43 – 1.87  | 0.219            | -0.30                         | 0.55              | -1.39 – 0.78  | 0.586            |
| <b>Late infection x Placental malaria</b>                  | -1.18                         | 0.64              | -2.44 – 0.08  | <b>0.066</b>     | -1.14                         | 0.60              | -2.31 – 0.03  | <b>0.056</b>     |

Length- and weight-for age Z scores defined using WHO Child Growth standards. SARS-CoV-2 infection during early pregnancy defined as IgM positive at enrollment in second trimester. SARS-CoV-2 infection during late pregnancy defined as seronegative in second trimester and seropositive at delivery. BMI=body mass index.

**Table S2. Birth and infant outcomes by variant of exposure**

|                                           | Alpha (N=31)         | Delta (N=48)         | Total (N=79)          | p value |
|-------------------------------------------|----------------------|----------------------|-----------------------|---------|
| Spontaneous abortion                      | 1 (3.2%)             | 1 (2.1%)             | 2 (2.5%)              | 0.752   |
| Stillbirth                                | 0 (0.0%)             | 1 (2.1%)             | 1 (1.3%)              | 0.421   |
| Preterm birth                             | 4 (13.3%)            | 2 (4.3%)             | 6 (7.9%)              | 0.156   |
| Low Birth Weight                          | 1 (3.3%)             | 3 (6.5%)             | 4 (5.3%)              | 0.543   |
| Small for gestational age                 | 4 (13.3%)            | 6 (13.0%)            | 10 (13.2%)            | 0.971   |
| Mother's WBC at delivery (cells/ $\mu$ l) | 10840 (8935, 13835)  | 11350 (9110, 13050)  | 11200 (9013, 13398)   | 0.713   |
| Female gender                             | 12 (40.0%)           | 22 (46.8%)           | 34 (44.2%)            | 0.557   |
| Birth Weight (g)                          | 3080 (2945, 3325)    | 2950 (2800, 3268)    | 3000 (2800, 3280)     | 0.310   |
| Birth length (cm)                         | 47 (46, 48)          | 47 (44-48)           | 47 (45-48)            | 0.482   |
| Placental malaria                         | 9 (36.0%)            | 14 (37.8%)           | 23 (37.1%)            | 0.883   |
| Height at 12 weeks (cm)                   | 59 (58-60)           | 56 (55-59)           | 58 (55-59)            | 0.037   |
| Weight at 12 weeks (kg)                   | 5.69 (5.40, 6.76)    | 5.53 (5.00, 6.02)    | 5.55 (5.28, 6.14)     | 0.088   |
| Length-for-age Z score at 12 weeks        | -0.42 (-1.34, -0.13) | -2.01 (-2.88, -0.47) | -1.34 (-2.31, -0.360) | 0.037   |
| Weight-for-age Z score at 12 weeks        | -0.35 (-0.72, 0.73)  | -0.42 (-1.28, -0.05) | -0.39 (-1.02, 0.10)   | 0.159   |
| Stunting at 12 weeks                      | 1 (9.1%)             | 11 (52.4%)           | 12 (37.5%)            | 0.016   |
| Underweight at 12 weeks                   | 0 (0.0%)             | 2 (9.5%)             | 2 (6.2%)              | 0.290   |

IQR=Interquartile range. Length- and Weight-for-age Z scores determined from WHO reference

standards. P values are reported for chi-square tests of proportions for categorical variables [displayed as n (%)], and Mann-Whitney U tests for continuous variables [displayed as median, (IQR)].

**Figure S1. Comparison of Spike antibody levels as measured by Luminex vs MSD**

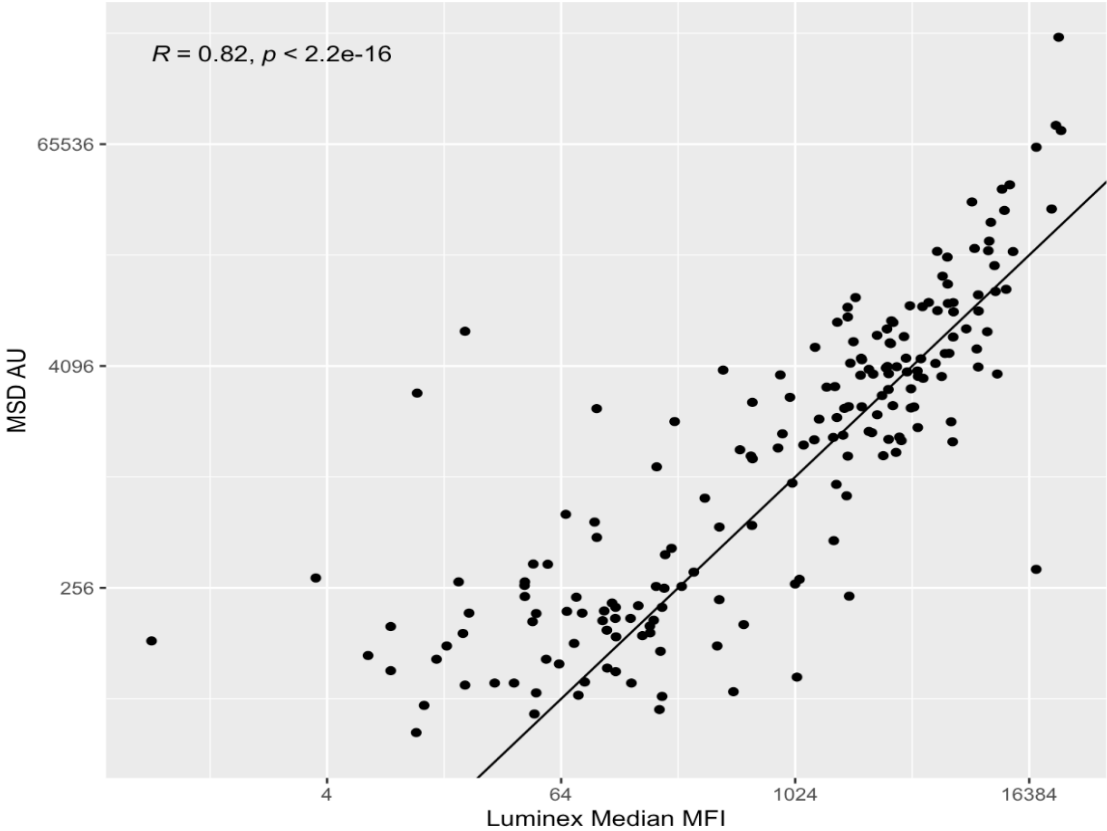

Correlation of Luminex SARS-CoV-2 Spike IgG median MFI with SARS-CoV-2 Wuhan-Hu-1 Spike IgG AU as measured on MSD platform.
